1 **Leveraging expression from multiple tissues using sparse canonical**  
2 **correlation analysis and aggregate tests improve the power of transcriptome-**  
3 **wide association studies**

4

5 Authors

6 Helian Feng<sup>1,2</sup>, Nicholas Mancuso<sup>3,4</sup>, Alexander Gusev<sup>5,6,7</sup>, Arunabha Majumdar<sup>8,9</sup>,  
7 Megan Major<sup>10</sup>, Bogdan Pasaniuc<sup>8,9</sup>, Peter Kraft<sup>1,2</sup>

8

9 Affiliations

- 10 1. *Department of Epidemiology, Harvard T.H. Chan School of Public Health,*  
11 *Boston, Massachusetts, USA;*
- 12 2. *Department of Biostatistics, Harvard T.H. Chan School of Public Health, Boston,*  
13 *Massachusetts, United States of America;*
- 14 3. *Center for Genetic Epidemiology, Department of Preventive Medicine, Keck*  
15 *School of Medicine, University of Southern California, Los Angeles, California,*  
16 *United States of America;*
- 17 4. *Division of Biostatistics, Department of Preventive Medicine, Keck School of*  
18 *Medicine, University of Southern California, Los Angeles California, United*  
19 *States of America;*
- 20 5. *Department of Medical Oncology, Dana-Farber Cancer Institute & Harvard*  
21 *Medical School, Boston, MA, USA*
- 22 6. *Division of Genetics, Brigham & Women's Hospital, Boston, MA, USA*
- 23 7. *Medical and Population Genetics, Broad Institute, Cambridge, Massachusetts,*  
24 *United States of America;*
- 25 8. *Department of Human Genetics, University of California Los Angeles, Los*  
26 *Angeles, California, United States of America;*
- 27 9. *Department of Pathology and Laboratory Medicine, University of California Los*  
28 *Angeles, Los Angeles, California, United States of America*
- 29 10. *Bioinformatics Interdepartmental Program, University of California Los Angeles,*  
30 *Los Angeles, California*

## 31 **Abstract**

32 Transcriptome-wide association studies (TWAS) test the association between traits and  
33 genetically predicted gene expression levels. The power of a TWAS depends in part on the  
34 strength of the correlation between a genetic predictor of gene expression and the causally  
35 relevant gene expression values. Consequently, TWAS power can be low when expression  
36 quantitative trait locus (eQTL) data used to train the genetic predictors have small sample sizes,  
37 or when data from causally relevant tissues are not available. Here, we propose to address these  
38 issues by integrating multiple tissues in the TWAS using sparse canonical correlation analysis  
39 (sCCA). We show that sCCA-TWAS combined with single-tissue TWAS using an aggregate  
40 Cauchy association test (ACAT) outperforms traditional single-tissue TWAS. In empirically  
41 motivated simulations, the sCCA+ACAT approach yielded the highest power to detect a gene  
42 associated with phenotype, even when expression in the causal tissue was not directly measured,  
43 while controlling the Type I error when there is no association between gene expression and  
44 phenotype. For example, when gene expression explains 2% of the variability in outcome, and  
45 the GWAS sample size is 20,000, the average power difference between the ACAT combined  
46 test of sCCA features and single-tissue, versus single-tissue combined with Generalized Berk-  
47 Jones (GBJ) method, single-tissue combined with S-MultiXcan or summarizing cross-tissue  
48 expression patterns using Principal Component Analysis (PCA) approaches was 5%, 8%, and  
49 38%, respectively. The gain in power is likely due to sCCA cross-tissue features being more  
50 likely to be detectably heritable. When applied to publicly available summary statistics from 10  
51 complex traits, the sCCA+ACAT test was able to increase the number of testable genes and  
52 identify on average an additional 400 additional gene-trait associations that single-trait TWAS

53 missed. Our results suggest that aggregating eQTL data across multiple tissues using sCCA can  
54 improve the sensitivity of TWAS while controlling for the false positive rate.

55

## 56 **Author summary**

57 Transcriptome-wide association studies (TWAS) can improve the statistical power of genetic  
58 association studies by leveraging the relationship between genetically predicted transcript  
59 expression levels and an outcome. We propose a new TWAS pipeline that integrates data on the  
60 genetic regulation of expression levels across multiple tissues. We generate cross-tissue  
61 expression features using sparse canonical correlation analysis and then combine evidence for  
62 expression-outcome association across cross- and single-tissue features using the aggregate  
63 Cauchy association test. We show that this approach has substantially higher power than  
64 traditional single-tissue TWAS methods. Application of these methods to publicly available  
65 summary statistics for ten complex traits also identifies associations missed by single-tissue  
66 methods.

67

## 68 **Introduction**

69 Genome-wide association studies (GWASs) have successfully identified thousands of  
70 associations between single-nucleotide polymorphisms (SNPs) and complex human phenotypes.  
71 Yet, the interpretation of these identified associations remains challenging, and several lines of  
72 evidence suggest that many additional associated loci remain to be identified [1, 2]. A recently  
73 proposed approach transcriptome-wide association study (TWAS) [3, 4] identifies genetic  
74 associations by combining GWAS data with expression quantitative trait locus (eQTL) data.  
75 TWAS can be used both to identify new associations and prioritize candidate causal genes in  
76 GWAS-identified regions [5]. TWAS integrates gene expression with GWAS data using only  
77 genotype expression imputation from a gene expression model built from eQTLs, and then test  
78 for the association between imputed gene expression level and a phenotype of interest. The main  
79 strength of TWAS is that it can infer the association of imputed gene expression with the  
80 phenotype using only GWAS summary statistics data [3, 4]. TWAS can increase the statistical  
81 power by combining single-SNP association tests in a biologically motivated fashion and  
82 reducing the number of tests performed. The applications of TWAS have led to novel insights  
83 into the genetic basis for several phenotype and diseases [6].

84

85 Despite the successes of TWAS, the approach has multiple limitations [7]. First, the most  
86 relevant tissue for many human diseases and phenotypes remains unclear, and the eQTL data for  
87 these relevant tissues are usually challenging to access in large samples. The choice of the most  
88 relevant tissue-specific eQTL sample for building gene expression prediction model in TWAS  
89 remains largely ad-hoc. Two commonly adopted approaches are: (1) using the largest eQTL  
90 sample accessible (usually whole blood [3]), or (2) using the most relevant tissue based on

91 previous knowledge and experience [6, 8]. Second, the power of TWAS is mainly bounded by  
92 the sample size of eQTL data; power of TWAS increases dramatically with the eQTL sample  
93 size, approaching an empirical maximum when eQTL sample size is close to 1,000 [3].  
94 However, most available eQTL data sets have a sample size substantially smaller than 1,000. For  
95 example, Genotype-Tissue Expression(GTEx) project [9, 10] have generated matched genotype  
96 and expression data for 44 human tissues, but with sample size for each tissue varying from only  
97 70 to 361. Researchers do not always know which tissue to use, and sometimes the sample size  
98 for the tissue that they prefer to use is too small to have enough power.

99  
100 Recent work in gene regulation patterns across tissues suggests that local gene expression  
101 regulation is often shared across tissues [9-11]. Thus, combining eQTL data across multiple  
102 tissues can improve the power of TWAS, by increasing the effective eQTL sample size or  
103 increasing the likelihood that the causal tissue (or a close proxy) is included in the eQTL training  
104 data. Two previously proposed approaches, UTMOST [12] and S-MultiXcan [13], have shown  
105 the advantage of a multi-tissue TWAS approach. However, these two approaches still conduct  
106 the TWAS test with single-tissue TWAS weights first, and then combine multiple single-tissue  
107 associations into a single powerful metric to quantify. UTMOST uses a generalized Berk-Jones  
108 (GBJ) test, which is a set-based method [12]. S-MultiXcan proposes a combined chi-square test  
109 that uses principal components from the tissue-specific genetically predicted expression values to  
110 integrate univariate S-PrediXcan results [13]. We refer to these two approaches as single-tissue  
111 based cross-tissue TWAS approach. We propose to leverage the correlated gene expression  
112 pattern across tissues in the eQTL dataset directly to build more stable and representative cross-  
113 tissue gene expression features using sparse canonical correlation analysis (sCCA) [14], and thus

114 improve the gene expression prediction model for TWAS. The potential advantage of sCCA is  
115 that it can capture any genetic contribution to gene expression that is shared across multiple  
116 tissues. Because sCCA maximizes the correlation between a linear combination of tissue-specific  
117 expression values and linear combination of cis-genotypes, sCCA features are more likely to be  
118 detectably heritable than cross-tissue features constructed using principal components analysis  
119 (PCA), which constructs linear combinations to capture total (genetic plus non-genetic)  
120 expression variance [14]. In addition, we also propose an omnibus test that combines the single  
121 tissue TWAS test results with the sCCA-TWAS test results using the aggregate Cauchy  
122 association test (ACAT). ACAT is a computationally efficient P-value combination method for  
123 boosting the power in sequencing study, and has proved to be powerful for detecting a sparse  
124 signal [15].

125  
126 Specifically, we propose a novel four-step pipeline to perform multi-tissue TWAS: 1. generate  
127 sparse canonical correlation analysis (sCCA) [14] -based cross-tissue features (sCCA-features)  
128 integrating eQTL data across multiple tissues; 2. fit TWAS weights for these sCCA-features as  
129 well as single tissue-specific gene expression [3, 4]; 3. perform TWAS with weights built from  
130 sCCA-features and single tissue gene expression [3, 4]; 4. combine the test results of sCCA  
131 TWAS results and single tissue TWAS results using the aggregated Cauchy association test  
132 (ACAT) [15]. We use extensive simulations to compare this approach with four other cross-  
133 tissue approaches, including: 1. performing TWAS on single most relevant tissue, 2. performing  
134 TWAS on all single tissues available and combining the test results via Bonferroni or generalized  
135 Berk-Jones (GBJ) test [16]; 3. using Principal Components Analysis (PCA) to create cross-tissue  
136 features; and 4. the recently proposed S-MultiXcan approach [13].

137

138 Through simulations we show that sCCA-features identify a larger number of cis-heritable  
139 transcripts than single tissue and PCA-features, and the combined test substantially improves  
140 statistical power. Importantly, all approaches successfully control the type I error rate. We also  
141 show by simulations that the power of our combined test compares favorably to other approaches  
142 despite using incomplete gene expression matrix for all individuals and all tissues thus requiring  
143 imputation, as is often the case for multi-tissue gene expression dataset like GTEx [9, 10].

144

145 We applied our four-step approach to eQTL data from GTEx and 10 sets of publicly available  
146 GWAS summary statistics data. We built sCCA-features on an expression matrix including 134  
147 individuals with data in 22 tissues. The sCCA-TWAS results were then compared with the  
148 single-tissue based TWAS results available on TWAS HUB (<http://twas-hub.org>). sCCA-TWAS  
149 was able to increase the number of testable genes by 81% and double the number of identified  
150 gene-phenotype associations.

151

## 152 **Results**

### 153 **Methods Overview**

154 Our proposed method entails four steps: the feature generating step, weight building step, TWAS  
155 step, and tests combining step (Fig. 1). In the feature generating step, we considered three  
156 approaches to build TWAS weights using eQTL data from multiple tissues. The first approach  
157 builds gene expression prediction weights in each tissue one at a time. The second approach,  
158 which we call the PCA-TWAS approach, first performs PCA on the gene expression matrix to  
159 create the top PCs (we restricted to top 3 PCs in this work). These PCs are then used as new gene

160 expression feature to build the gene expression weights and perform TWAS. In the final  
161 approach, sCCA-TWAS, we propose to use sCCA to build cross-tissue gene expression features  
162 as the weighted average of gene expression across multiple tissues (see Methods). These  
163 weighted averages maximize the correlation between the weighted average of gene expressions  
164 across tissues and *cis*-genotypes (within 500kb of the gene boundary). In the weight building  
165 step, we build TWAS weights for each of these multi-tissue features by regressing the feature on  
166 *cis*-SNPs in the gene's window. In the second step of TWAS, we perform tests for association  
167 using these set of weights (for each single-tissue or multi-tissue feature) separately. Finally, in  
168 the tests combining step, the single-tissue TWAS tests are combined using a Bonferroni multiple  
169 testing adjustment, the Generalized Berk-Jones (GBJ) procedure, or S-MultiXcan [13, 16] (see  
170 Methods for more details). We also propose a combined test of single-tissue test and sCCA  
171 cross-tissue test by combining the test results with ACAT [15].

172

173 We compared the performance of sCCA based cross-tissue TWAS with single tissue based  
174 cross-tissue TWAS approaches (Bonferroni, GBJ, S-MultiXcan) and PCA based cross-tissue  
175 TWAS through 2,000 simulations based on GTEx data. We conducted the simulations varying  
176 gene expression heritability, genetic correlation in expression across tissues, the proportion of  
177 tissues correlated with the causal tissue, the scale of non-centrality parameters in the GWAS *z*-  
178 score distribution (to model GWAS sample size), and whether gene expression from the  
179 underlying causal tissue is observed (i.e. not included in model training) or not.

180

181 **sCCA improves statistical power to detect heritable gene expression**



182 The first step of the TWAS approaches we consider tests the cis-heritability of each gene  
183 expression feature; the features that demonstrate significant heritability are only analyzed further.  
184 Fig. 2 compares the power of this heritability test for single-tissue, PC and sCCA expression  
185 features in the scenario where half of the tissues are correlated with the causal tissue, and the  
186 causal tissue is not observed. The relative performance of these features is very similar in the  
187 other scenarios (S1 and S2 Figs). The power of detecting heritable genes at a set alpha level  
188 increases as the correlation between correlated tissue and causal tissue or the heritability for gene  
189 expression in causal tissue increases. On average, the sCCA-features have a consistently higher  
190 chance of being heritable: they were 2.78x and 3.72x more likely to be heritable compared to the  
191 single tissue-based features and PCA based features.

192

193 The power of heritability test for PCA based cross-tissue TWAS is generally low, and the PC  
194 that captures the genetic signal best varies across scenarios (S3 Fig). The PCs that explain more  
195 of the variance in gene expression are not necessarily more heritable. Sometimes the second or  
196 third PC is heritable, but the first PC is not. We also observed that the chance of the PCA based  
197 feature to be heritable decreased with as the correlation between the genetic effect of the  
198 correlated tissue and the causal tissue increased. This may occur because non-genetic sources of  
199 correlation in expression across tissues outweigh genetic sources when the genetic contributions  
200 to expression are highly correlated. In this setting, the top PCs often do not capture the genetic  
201 effects.

202

203 Because sCCA features are constructed by maximizing the correlation between gene expression  
204 and genotype, the Type I error rate for the cis-heritability test can be inflated due to overfitting.

205 In fact, we did observe an inflated Type I error rate for heritability test under null for sCCA (S4  
206 Fig). Considering individual features, the sCCA-feature1 had the highest Type I error rate at  
207 0.43, while PC-feature1 had a slightly inflated type I error rate at 0.06 and the single tissue  
208 features maintained the Type I error rate at 0.05 level. But when we account for overall testing of  
209 3 sCCA features, 3 PCS features and 22 single tissue features, the Type I error rate for at least  
210 one single tissue being significantly heritable at 0.05 level was 0.65 which is similar to the  
211 observed Type I error rate for at least one of the sCCA features being heritable. We note that  
212 standard TWAS pipelines typically do not adjust for the number of tissue features tested at the  
213 heritability stage. Most importantly, even though the cis-heritability test had an inflated rate of  
214 Type I error, the final Type I error rate for the sCCA-TWAS while testing for an association  
215 between predicted expression and phenotype was still well controlled (S5 Fig).

216

### 217 **sCCA-features increase power of cross-tissue TWAS**

218 Next, we compare the power of various approaches to multi-tissue TWAS to detect gene-trait  
219 associations via simulation. We simulated genotype and expression data using linkage  
220 disequilibrium (LD) and expression correlation information from GTEx. We set the gene  
221 expression in one tissue to be causal for the phenotype and varied the variance explained by  
222 genotype for the causal tissue, number of tissues with gene expression correlated with the causal  
223 tissue and the corresponding correlation (see Methods for more details). All methods control the  
224 Type I error when expression is not associated with the outcome (S5 Fig). In simulations, we  
225 varied the correlation between the casual and correlated tissue, the proportion of other tissues  
226 correlated with the casual tissue, whether the test results from the causal tissue was observed or  
227 not, and the proportion of gene expression variation explained by genotype in the casual tissue

228 (see Methods for details). In the simulation scenarios that we considered—all of which involved  
229 some correlation between the genetic contribution to gene expression in the causal tissue and at  
230 least one other tissue—we observed that the relative performance of different methods did not  
231 change as a function of the genetic correlation between the casual tissue and the correlated  
232 tissues, or the proportion of all tissues correlated with the casual tissue, or whether the causal  
233 tissue was analyzed (S1 and S2 Figs, S1-3 Tables).

234

235 We considered three sets of methods: (1) single tissue TWAS based approaches, which perform  
236 the single tissue based TWAS and either account for multiple testing using Bonferroni or GBJ  
237 corrections, or combine the test results using S-MultiXcan ; (2) tests based on cross-tissue  
238 features (using PCA or sCCA to build cross-tissue features); and (3) combined test of both  
239 single-tissue based methods and cross-tissue feature based methods, using either Bonferroni or  
240 ACAT to adjust for multiple testing [15].

241

242 First, for the single tissue-based approaches, GBJ and S-MultiXcan had either similar power or  
243 GBJ had slightly higher power than S-MultiXcan. For example, when gene expression explains  
244 2% of the variability in outcome and the GWAS sample size is 20,000, the average power of  
245 single-tissue test combined with GBJ and single-tissue combined with S-MultiXcan was 0.34,  
246 and 0.29, respectively. Second, for the approaches using cross-tissue features, sCCA yielded a  
247 substantially higher power than PCA under all scenarios (the average power is 0.26 for sCCA  
248 and  $<10^{-4}$  for PCA, S1-3 Tables). Third, for approaches to combine sCCA-TWAS and single  
249 tissue TWAS test results, combining sCCA-TWAS and single tissue TWAS test results with

250 ACAT [15] yielded 1.37 times greater power than combining them with Bonferroni (the average  
251 power is 0.38 for ACAT and 0.37 for Bonferroni, S1-3 Tables).

252

253 Finally, we compared single-tissue, cross-tissue, and combined single- and cross-tissue  
254 approaches. For simplicity, we only present comparisons between single-tissue based tests using  
255 GBJ to combine evidence across tissues, cross-tissue feature based approach with sCCA-  
256 features, and combined test of single-tissue based approach and sCCA-feature with ACAT.

257

258 Under the alternative, when gene expression has local genetic effects and gene expression is  
259 associated with the trait, the combined test of sCCA-features and single tissue-features using  
260 ACAT had the greatest power to detect a gene associated with the outcome, even when  
261 expression in the causal tissue was not directly measured (Fig 3). For example, when gene  
262 expression explains 2% of the variability in outcome and the GWAS sample size is 20,000, the  
263 average power for the ACAT [15] combined test of sCCA features and single-tissue test, sCCA-  
264 TWAS and single-tissue tests combined with GBJ was 0.38, 0.23 and 0.34, respectively (S1-3  
265 Tables). The gain in power is likely because sCCA cross-tissue features are more likely to be  
266 significantly heritable, and thus increase the number of testable genes. This is particularly  
267 relevant for genes with low heritability: for such a gene, sCCA-TWAS has superior power (Fig 3  
268 left panels). On the other hand, for highly heritability genes, single-tissue-based tests have better  
269 power than sCCA features. The combined test using both sCCA-TWAS and single-tissue TWAS  
270 results thus has superior power in both low- and high-heritability settings. Of note, the gain in  
271 power due to combining tests that perform well in different settings can be offset by the potential  
272 increased multiple testing burden. Fig. 3 presents power comparisons under the scenario where

273 half of the tissues are correlated with the causal tissue and the causal tissue is not observed  
274 (power under other scenarios are reported in S1-3 Tables).

275

276 **sCCA-features provide insight into tissues where gene expression is associated with**  
277 **outcome**

278 Although our primary motivation for combining multiple tissues when building expression  
279 weights is to increase the power of TWAS, since sCCA performs feature selection on the tissues  
280 as well as the cis-SNPs, it has the potential to suggest which tissues may be responsible for an  
281 identified TWAS association.

282

283 Fig. 4 shows the sensitivity and specificity for the first sCCA component placing non-zero  
284 weight on the causal tissue (if included in the expression panel), or a tissue whose genetic  
285 contribution is correlated with that of the causal tissue. The sensitivity of the first sCCA  
286 component putting a non-zero weight on a causal or correlated tissue increases with the gene  
287 expression  $h_g^2$  and the correlation between the causal tissue and the correlated tissues. Under our  
288 simulation assumption, the specificity of the first sCCA component is consistently high, which  
289 indicates that when combining gene expression across tissues with sCCA, it is less likely that  
290 non-relevant tissues would be included in the top sCCA expression feature. Thus, sCCA can  
291 effectively increase sample size while excluding noise. The tissues with non-zero weights in  
292 sCCA have a higher probability of being causal.

293

294

295

## 296 **sCCA performance is stable to missing data imputation in the expression data**

297 The sCCA-TWAS approach requires a complete gene expression matrix: every individual used  
298 to train the sCCA features must have expression data from every tissue included in the analysis.  
299 However, this is typically not true for multi-tissue gene expression datasets like GTEx [9], where  
300 not all donors have samples or expression data from all tissues. A complete case analysis can  
301 greatly reduce the sample size available to train sCCA features. On the other hand, imputing  
302 missing expression data may induce measurement error or bias. We evaluate the impact of  
303 imputing missing expression data via simulation. We simulate complete gene expression and  
304 genotype data based on correlations in gene expression observed across GTEx; we then perform  
305 single-tissue based TWAS using weights trained in the complete data set. For sCCA and PCA  
306 based approaches, we mask the expression data matrix randomly based on the missing proportion  
307 pattern for each tissue in GTEx, then impute the missing expression data with MICE [17], using  
308 the "predictive mean matching" method. We then perform sCCA-TWAS or PCA-TWAS on the  
309 imputed gene expression dataset. sCCA-TWAS applied to imputed expression data still correctly  
310 controlled the Type I error rate. Although the power for sCCA-TWAS was lower when using  
311 imputed expression data (across all scenario decreased from 0.38 to 0.21), the sCCA-TWAS still  
312 provide valuable information when the genetic signal for gene expression is weak.

313

## 314 **Real-data application**

315

### 316 **Applying sCCA to GTEx data increased the number of testable genes**

317 We applied the sCCA-TWAS approach based on top 3 sCCA-features to integrate GTEx data  
318 (version 6) and GWAS summary statistics data for 10 complex traits using the same *cis*-

319 heritability filter as TWAS HUB, and compared the results with single tissue based TWAS  
320 results on TWAS HUB [18]. The phenotype information is included in Table 1 and the tissue  
321 expression dataset information is included in S4 Table. We choose to include top 3 sCCA-  
322 features as we observed in the simulation study that the gain in power due to including more  
323 features was negligible (S7 Fig). With sCCA cross-tissue features, we increased the number of  
324 testable genes to 21,740 compared to 12,027 (all GTEx tissues on TWAS HUB) and 18,954 (all  
325 panels on TWAS HUB). Among the genes that we could test using sCCA-TWAS, 10,649 genes  
326 were not testable in any of the other single-tissue panels available (that is, they did not pass the  
327 filtering criterion for cis-heritability or prediction strength set by TWAS-HUB). At the same  
328 time, with sCCA-features that combine expression profiles across multiple tissues, we reduced  
329 the multiple testing burden from 84,964 (GTEx tissues) and 157,316 (all panels in TWAS HUB)  
330 to 38,620. When the *cis*-genetic regulation is shared across multiple tissues, sCCA-TWAS  
331 reduces the redundancy in expression features tested. Using sCCA-TWAS as opposed to single-  
332 tissue TWAS increased the number of testable genes relative to single GTEx tissues by 81% and  
333 reduced the multiple testing burden by 55%; relative to all panels in TWAS HUB we increased  
334 the number of testable genes by 56% and reduced the multiple testing burden by 75% [18].

**Table 1. Summary of data application results**

| Trait                                 | GWAS sample size | Number of significant loci | Total number of significant genes in TWAS HUB | Number of significant genes in GTEx panel | Number of significant genes by sCCA-TWAS | Number of significant genes by ACAT | Reference                       |
|---------------------------------------|------------------|----------------------------|-----------------------------------------------|-------------------------------------------|------------------------------------------|-------------------------------------|---------------------------------|
| Alzheimer.s Disease (including proxy) | 388324           | 17                         | 70                                            | 34                                        | 44                                       | 51                                  | Marioni et al. 2018 Nat Comms   |
| Breast Cancer                         | 228951           | 79                         | 353                                           | 162                                       | 260                                      | 278                                 | Michailidou 2017 Nature         |
| Coronary Artery Disease (CAD)         | 56422            | 11                         | 17                                            | 11                                        | 8                                        | 11                                  | Schunkert et al. 2011 Nat Genet |



|                                 |        |     |      |      |      |      |                                      |
|---------------------------------|--------|-----|------|------|------|------|--------------------------------------|
| Type 2 Diabetes<br>(T2D) (2012) | 48761  | 5   | 5    | 4    | 2    | 4    | Morris et al.<br>2012 Nat<br>Genet   |
| Schizophrenia<br>(2018)         | 65967  | 38  | 167  | 58   | 138  | 90   | Ruderfer et al.<br>2018              |
| BMI                             | 457824 | 255 | 1592 | 782  | 1132 | 1246 | UKBB Loh et<br>al. 2018 Nat<br>Genet |
| Height                          | 458303 | 423 | 5709 | 2891 | 4080 | 5112 | UKBB Loh et<br>al. 2018 Nat<br>Genet |
| Smoking Status                  | 457683 | 59  | 233  | 106  | 166  | 164  | UKBB Loh et<br>al. 2018 Nat<br>Genet |

|                                |        |    |     |     |     |     |                                      |
|--------------------------------|--------|----|-----|-----|-----|-----|--------------------------------------|
| Chronotype<br>(morning person) | 410520 | 69 | 202 | 82  | 145 | 140 | UKBB Loh et<br>al. 2018 Nat<br>Genet |
| Tanning                        | 449984 | 65 | 382 | 197 | 274 | 325 | UKBB Loh et<br>al. 2018 Nat<br>Genet |

335 **Real-data application detects novel predicted-expression to phenotype associations**

336 The sCCA-ACAT and sCCA-feature TWAS detected additional associations between predicted  
337 gene expression and phenotype for the 10 GWAS traits we considered (Table 1). The single-  
338 tissue TWAS tests with GTEx weights identified 4,327 phenotype gene expression associations.  
339 In aggregate, sCCA-TWAS identified 4,400 additional associations for 10 phenotypes compared  
340 to single tissue GTEx TWAS, and the sCCA-ACAT combined test identified 3,277 additional  
341 associations compared to single tissue GTEx TWAS (Figs 5 and 6). The two phenotypes with the  
342 largest number of associated genes identified are height and BMI, which are both highly  
343 polygenetic. To further contrast the significant associations identified, we considered the overlap  
344 between the associations identified with sCCA cross-tissue TWAS and single tissue TWAS for  
345 each phenotype. On an average, 18% of the gene-phenotype associations were identified by both  
346 single-tissue TWAS and sCCA TWAS, 49% gene-phenotype associations were only identified  
347 by sCCA-TWAS, and 34% signals were only detected by single tissue TWAS (Fig 7).

348  
349 ACAT served as a good combination method for single tissue and sCCA TWAS. Out of the total  
350 number of associations identified by either single-tissue TWAS, sCCA-TWAS, or sCCA-ACAT,  
351 85% were significant in the sCCA-ACAT combined test. Among the gene-trait associations that  
352 were identified using the sCCA-ACAT approach, 41% were also identified by the single tissue  
353 approach but not the sCCA approach; 36% were also identified using the sCCA approach but not  
354 the single-tissue approach; 23% were identified using all three approaches; and 1% were  
355 identified using only the sCCA-ACAT combined approach. Fig 8 shows the breakdown in the  
356 testing performance by phenotype.

357

358 Direct comparison of the absolute z-scores from all the single tissue TWAS and sCCA-TWAS  
359 shows a correlation of 0.86. The sCCA-TWAS absolute z-score is slightly greater than the  
360 median value of single tissue absolute z-score of the same gene from multiple tissues (S6 Fig).

361

## 362 **Discussion**

363 We have proposed a novel approach (sCCA-TWAS) to constructing cross-tissue expression  
364 features using sparse canonical correlation analysis to boost the power of transcriptome-wide  
365 association studies. Through simulations we show that if the genetic component of gene  
366 expression in the causal tissue is correlated with the genetic contribution of expression in other  
367 tissues, then sCCA-TWAS has greater power than the approaches that use TWAS test statistics  
368 based on single-tissue features, including simply applying Bonferroni correction for the number  
369 of tissues tested or combining single-tissue tests using a GBJ procedure or S-MultiXcan [13, 16].  
370 We have also proposed to combine sCCA-TWAS tests with single-tissue TWAS tests  
371 implementing the aggregate Cauchy association test (sCCA+ACAT). sCCA+ACAT achieves  
372 optimal or near-optimal power among the procedures considered both when the causal tissue is  
373 genetically correlated with other tissues and when it is not, suggesting that the sCCA+ACAT is a  
374 useful method when the genetic architecture of tissue-specific expression and its relationship to  
375 outcome is unknown. This increase in power is due in part to the greater number of genes with  
376 significantly heritable sCCA features relative to single-tissue features. sCCA-TWAS also greatly  
377 improved power relative to another cross-tissue technique using PCA to create cross-tissue  
378 features, as the leading principal components often capture non-genetic sources of covariation in  
379 gene expression (a general drawback to cross-trait association analysis using PCA[19]).  
380 Moreover, the tissue-wise loadings from sCCA factors associated with outcome may provide

381 some guidance to which tissues are causally related to the outcome (or genetically correlated  
382 with the unmeasured causal tissue).  
383  
384 sCCA- and sCCA+ACAT- TWAS can be useful in a situation where eQTL data on germline  
385 genetic variation and expression in multiple tissues or cell-types are available on the same set of  
386 individuals. sCCA-TWAS cannot be directly applied when eQTL data on different tissues are  
387 available on different, non-overlapping samples. When both a multi-tissue reference panel (such  
388 as GTEx) and additional large single-tissue reference panels are available, sCCA+ACAT can  
389 make use of both the cross-tissue features from the multi-tissue panel and the independent single-  
390 tissue panels. Finally, inferring the causal tissue from a set of cross-tissue or single-tissue TWAS  
391 results remains an important open question. Although the tissue weights from the sCCA features  
392 may provide some clues, further work is needed to develop principled sensitive and specific  
393 methods for identifying candidate causal tissues.

394

395

## 396 **Methods**

### 397 **sCCA**

398 Suppose that we have  $n$  observations on  $p_1 + p_2$  variables, and the variables are naturally  
399 partitioned into two groups of  $p_1$  and  $p_2$  variables, respectively. Let  $\mathbf{G} \in \mathbb{R}(n \times p_1)$  correspond  
400 to the first set of variables, and let  $\mathbf{X} \in \mathbb{R}(n \times p_2)$  correspond to the second set of variables.  
401 Assume that the columns of  $\mathbf{G}$  and  $\mathbf{X}$  have been standardized to have mean zero and standard  
402 deviation one. In our setting,  $\mathbf{G}$  is a matrix of standardized genotypes with SNPs corresponding

403 to the columns and  $\mathbf{X}$  is a matrix of tissue-specific gene expression values with genes  
 404 corresponding to the columns.

405

406 Standard CCA seeks  $\boldsymbol{\omega}_1 \in \mathbb{R}(p_1)$  and  $\boldsymbol{\omega}_2 \in \mathbb{R}(p_2)$  that maximize correlation between  $\mathbf{G}\boldsymbol{\omega}_1$  and  
 407  $\mathbf{X}\boldsymbol{\omega}_2$  [14], that is:

$$408 \quad \text{maximize}_{\boldsymbol{\omega}_1, \boldsymbol{\omega}_2} \boldsymbol{\omega}_1^T \mathbf{G}^T \mathbf{X} \boldsymbol{\omega}_2 \text{ subject to } \boldsymbol{\omega}_1^T \mathbf{G}^T \mathbf{G} \boldsymbol{\omega}_1 = \boldsymbol{\omega}_2^T \mathbf{X}^T \mathbf{X} \boldsymbol{\omega}_2 = \mathbf{1}$$

409

410 However, CCA is not appropriate when  $p_1, p_2 \approx n$  or  $p_1, p_2 \gg n$ . Witten et al. [14] proposed  
 411 sparse CCA, a penalized version of CCA, by adding L1 and L2 penalization in the previous  
 412 optimization problem [14] as:

413

$$414 \quad \text{maximize}_{\boldsymbol{\omega}_1, \boldsymbol{\omega}_2} \boldsymbol{\omega}_1^T \mathbf{G}^T \mathbf{X} \boldsymbol{\omega}_2 \text{ subject to } \boldsymbol{\omega}_1^T \mathbf{G}^T \mathbf{G} \boldsymbol{\omega}_1 \leq 1, \boldsymbol{\omega}_2^T \mathbf{X}^T \mathbf{X} \boldsymbol{\omega}_2 \leq 1, \text{ and } P_1(\boldsymbol{\omega}_1) \leq c_1, P_2(\boldsymbol{\omega}_2) \leq c_2$$

415

416 Using the identity matrix  $\mathbf{I}$  as a substitute for  $\mathbf{X}_1^T \mathbf{X}_1$  and  $\mathbf{X}_2^T \mathbf{X}_2$  gives what can be termed as  
 417 "diagonal penalized CCA", and the optimization problem can be re-formulated as:

418

$$419 \quad \text{maximize}_{\boldsymbol{\omega}_1, \boldsymbol{\omega}_2} \boldsymbol{\omega}_1^T \mathbf{G}^T \mathbf{X} \boldsymbol{\omega}_2 \text{ subject to } \|\boldsymbol{\omega}_1\|^2 \leq 1, \|\boldsymbol{\omega}_2\|^2 \leq 1, \|\boldsymbol{\omega}_1\|_1 \leq c_1, \|\boldsymbol{\omega}_2\|_1 \leq c_2$$

420

421 For a small  $c_1$  and  $c_2$ , this results in  $\boldsymbol{\omega}_1$  and  $\boldsymbol{\omega}_2$  to be sparse, i.e., many of the elements of  $\boldsymbol{\omega}_1$   
 422 and  $\boldsymbol{\omega}_2$  will be exactly equal to zero. Witten et al. proposed to solve this maximization problem  
 423 by initializing  $\boldsymbol{\omega}_2$  to belong to  $\mathbb{R}^q$ , and then iteratively maximizing  $\boldsymbol{\omega}_1^T \mathbf{G}^T \mathbf{X} \boldsymbol{\omega}_2$  subject to L1 and  
 424 L2 constraints for  $\boldsymbol{\omega}_1$  and  $\boldsymbol{\omega}_2$  in turn [14].  $\boldsymbol{\omega}_2$  was initialized to have L2-norm 1 and was

425 suggested to use the first right singular vector of  $\mathbf{X}$  as the initial value.  $c_1$  and  $c_2$  can be chosen  
426 by cross-validation, where  $c_1$  and  $c_2$  are chosen using a grid search to maximize  $\text{cor}(\mathbf{G}\boldsymbol{\omega}_1, \mathbf{X}\boldsymbol{\omega}_2)$   
427 (across the cross-validation folds). It can be shown that a maximum of  $\min(p, q)$  orthogonal  $\boldsymbol{\omega}_1$ ,  
428  $\boldsymbol{\omega}_2$  vectors can be generated by repeatedly applying this algorithm to the new correlation matrix  
429  $\mathbf{G}^T\mathbf{X}$  after regressing out the previous canonical component [14].

430

### 431 **TWAS**

432 The TWAS pipeline consists of three steps: first, identifying gene expression features that have  
433 positive cis-heritability; second, building a linear predictor for each cis-heritable gene feature;  
434 and third, constructing the TWAS test statistic combining the prediction weights and summary  
435 Z-scores from a trait GWAS.

436

437 We computed the p-values for testing  $\text{cis-}h_g^2=0$  using a likelihood ratio test implemented in  
438 GCTA that compares a model with a local random genetic effect to a model without a genetic  
439 effect [20]. We included all SNPs that fall within 500 kb of the transcription start and stop sites  
440 of a gene. We removed the genes that failed the heritability test from the set of candidate genes,  
441 and only the genes with a significant heritability were included in the subsequent prediction  
442 model construction.

443

444 We then used Elastic Net penalized regression implemented in the R package glmnet [21] to  
445 construct linear genetic predictors of gene expression features  $\mathbf{W}$  based on all the *cis* SNPs in the  
446 eQTL reference panel (500 base-pair window surrounding the transcription start and stop sites).  
447 We applied 5-fold cross-validation to choose the elastic net penalty parameters.

448 We calculated the TWAS test statistic as  $Z_{TWAS} = \mathbf{wZ}/(\mathbf{w}\boldsymbol{\Sigma}_{s,s}\mathbf{w}')^{1/2}$ , where  $\mathbf{Z}$  is a vector of  
449 standardized effect sizes of SNPs for a trait in the *cis* region of a given gene (Wald z-scores), and  
450  $\mathbf{w} = (w_1 w_2 w_3 \dots w_j)$  is a vector of prediction weights for the expression feature of the gene  
451 being tested, and  $\boldsymbol{\Sigma}_{s,s}$  is the LD matrix of the *cis* SNPs estimated from the 1000 Genomes Project  
452 as the LD reference panel. Under null hypothesis that there is no association between the gene  
453 expression feature and phenotype,  $Z_{TWAS}$  should follow a normal distribution with mean zero and  
454 variance one.

455

#### 456 **sCCA-TWAS**

457 Consider a gene expression array of a certain gene for  $n$  individuals and  $p_2$  tissues  $\mathbf{X}_{n \times p_2}$ , and the  
458 genotype data  $\mathbf{G}_{n \times p_1}$  for the same set of individuals at  $p_1$  *cis*-SNPs. Assume that the columns of  
459  $\mathbf{X}_{n \times p_2}$ , and  $\mathbf{G}_{n \times p_1}$  have been standardized to have mean zero and variance one.

460

461 We apply sCCA (described above) and extract the first three pairs of canonical vectors:  $(\boldsymbol{\omega}_1^{(1)},$   
462  $\boldsymbol{\omega}_2^{(1)})$ ,  $(\boldsymbol{\omega}_1^{(2)}, \boldsymbol{\omega}_2^{(2)})$  and  $(\boldsymbol{\omega}_1^{(3)}, \boldsymbol{\omega}_2^{(3)})$ . We define three sCCA features as  $\mathbf{X} \boldsymbol{\omega}_1^{(1)}$ ,  $\mathbf{X} \boldsymbol{\omega}_2^{(1)}$  and  $\mathbf{X} \boldsymbol{\omega}_1^{(3)}$   
463 . Then we treat the three sCCA-features as three repeated measure of gene expression across  
464 tissue and apply TWAS procedure to them, record the p-value for heritability and z-score of  
465 these three features. We account for testing multiple sCCA features per gene via Bonferroni's  
466 correction, including only the tests where the sCCA-feature passed the heritability test. We  
467 decided to include at most 3 sCCA features, because in simulations, the power gain from  
468 including more features appears to be small (Fig. S7).

469

#### 470 **Single tissue test based cross-tissue TWAS**



471 As a comparison, we also considered single-tissue test based cross-tissue TWAS, where we  
472 perform TWAS on the gene expression in each tissue, record the z-scores and p-values for  
473 heritability test, respectively. We account for testing multiple tissues for each gene via i) a  
474 Bonferroni multiple testing correction or ii) a generalized Berk-Jones (GBJ) test with single-  
475 tissue association statistics  $Z$  and their covariance matrix  $\Sigma$  as inputs [16]. We estimate  $\Sigma$  as  $W$   
476  $\Sigma_{s,s}W'$ , where  $W_{qxp}$  is a matrix with the expression weights for each tissue in each row and each  
477 SNP [12].

478

#### 479 **Combined test with sCCA-features and single-tissue features**

480 While sCCA can increase power when sample sizes in individual tissues are small and the  
481 genetic contribution to expression is shared across tissues, a single-tissue based approach may be  
482 more powerful when the genetic contribution to expression in the causal tissue is uncorrelated  
483 with genetic contribution to expression in other tissues. Thus, a combined test for sCCA-features  
484 and single-tissue features can have a better average power across a range of scenarios. We  
485 therefore consider approaches that combine sCCA and single-tissue expression features,  
486 accounting for testing multiple features per gene using a Bonferroni correction, the GBJ test  
487 [16], or the ACAT [15]. The GBJ test is a set-based test proposed for GWAS setting, which  
488 extended the Berk-Jones (BJ) statistics by accounting for correlation among tests [16]. ACAT is  
489 a fast p-value combination method that uses Cauchy distribution to approximate the distribution  
490 of a weighted sum of transformed p-values. ACAT has been shown to work well in the context  
491 of genetics research, mainly because it does not require the estimation of correlation structure  
492 among the combined p-values.

493

#### 494 **PCA based cross-tissue TWAS**

495 We also considered aggregating across tissue signal through Principal Component Analysis  
496 (PCA). We first applied PCA to the gene expression matrix  $\mathbf{X}_{n \times q}$ , then used the top 3 principal  
497 Components (PCs) as new feature for TWAS. We accounted for testing multiple PCs for each  
498 gene by Bonferroni adjustment, including only the tests where the PCs passed the heritability  
499 test.

500

#### 501 **S-MultiXcan**

502 Summary-MultiXcan (S-MultiXcan) is another single-tissue based approach for generating  
503 multi-tissue gene expression, and draw phenotype associations inference. It utilizes the LD  
504 information from a reference panel to integrate univariate S-PrediXcan results. It consists of the  
505 following steps: (1) computation of single tissue association test statistics  $\hat{\mathbf{Z}}$  with S-PrediXcan  
506 [2]; (2) estimation of the correlation in tissue-specific predicted gene expression levels using the  
507 LD information from a reference panel (typically GTEx or 1000 Genomes); (3) discarding  
508 components of smallest variation from the matrix of correlations in genetically-predicted tissue-  
509 specific gene expression levels to avert collinearity and numerical problems (singular value  
510 decomposition, analogous to PC analysis in individual-level data). (4) estimation of multi-tissue  
511 test statistics from the univariate (single-tissue) results with the help of expression correlation.

512

513 The aggregate S-MultiXcan test statistic is then calculated as  $\hat{\mathbf{Z}}^T \text{Cor}(\mathbf{X})^+ \hat{\mathbf{Z}} \sim \chi_k^2$ , where  $\text{Cor}$   
514  $(\mathbf{X})^+$  is the pseudo-inverse of a SVD-regularized version of the correlation matrix of  $\mathbf{X}$ , and  $k$   
515 the number of components surviving the SVD pseudo-inverse (the regularized version of the

516 correlation matrix is formed by decomposing the correlation matrix into its principal components  
517 and removing those eigenvectors corresponding to the eigenvalues  $\frac{\lambda_{max}}{\lambda_i} < 30$ .

518

### 519 **Data simulation settings**

520 We simulated genotype and expression data using linkage disequilibrium (LD) and expression  
521 correlation information from the Genotype-Tissue Expression project (GTEx) version 6 [9].  
522 GTEx includes data from 449 donors across 44 tissues, with tissue-specific sample sizes ranging  
523 from 70 to 361. We removed: (1) individuals with data available for less than 40% of the tissues  
524 and (2) tissues where less than 30% of the individuals have data. This results in a 134 ( $n$   
525 individuals) by 22 ( $p_2$  tissues) ordered expression matrix for each gene. We randomly sampled  
526 400 genes in the data set, extracted the cis-SNPs within 500kb around the gene boundary  
527 (number of cis-SNPs indicated by  $p_1$ ) and the gene expression for these 134 individuals and 22  
528 tissues, and imputed missing expression values with the column mean. We used this data set to  
529 calculate the correlation among gene expression levels across tissues ( $\Sigma_X$ ) and the LD structure  
530 of cis-SNPs ( $\Sigma_G$ ) for each of the 400 genes.

531

532 Individual-level data for a gene expression reference panel data were generated assuming that the  
533 gene expression for a particular gene in tissue  $i$  is  $\mathbf{X}_i = \mathbf{G}\boldsymbol{\beta}_i + \boldsymbol{\epsilon}_i$ , where  $\mathbf{G}$  is the local genotype  
534 matrix,  $\boldsymbol{\beta}_i$  is the weight for genotype on gene expression in tissue  $i$ , and the residuals  $\boldsymbol{\epsilon}_i$  are  
535 normally distributed, independent across individual but correlated across tissues. We generated  
536 each row in the  $n \times p_1$  genotype matrix  $\mathbf{G}$  as  $MVN_{p_1}$  with mean zero and variance-covariance  
537 matrix  $\boldsymbol{\Sigma}_G$ , the LD matrix calculated from the GTEx genotype data from the gene's cis region.  
538 We randomly sampled one tissue to be causal and  $N_{corr}$  tissues to be genetically correlated with

539 the causal tissue. We selected 3% of the cis-SNPs to be causally related to gene expression in the  
 540 causal tissue and sampled their weights for gene expression,  $\beta_{ij}^{causal}$  from normal distribution  
 541 with mean zero and variance  $h_g^2$ ; the remaining  $\beta_{ij}^{causal}$  for  $j$  not in the set of causal SNPs were set  
 542 to 0. To reflect the genetic correlation  $\rho$  between the causal tissue and the  $N_{corr}$  genetically  
 543 correlated tissues, the weight for the same SNPs in the correlated tissues were sampled as

$$544 \quad \beta_{correlated} \sim \text{MVN}^{N_{corr} \times p}(\mathbf{1}(\beta_{causal} \times \rho \times \mathbf{1}_{N_{corr}}(1 - \rho^2)) \times h_g^2 \cdot \mathbf{I}_{N_{corr}})$$

545 This resulted in a  $p_1$  by  $p_2$  weight matrix for genotype on tissue-specific gene. Residual gene  
 546 expression values were simulated as:

$$547 \quad \mathbf{e} \sim \text{MVN}^{n \times p}(\mathbf{0}, \text{diag}(\mathbf{s}_e) \times \mathbf{\Sigma}_X \times \text{diag}(\mathbf{s}_e))$$

548 where  $\mathbf{s}_e = \sqrt{\text{Var}(\mathbf{X}\beta_{q \times p}) \times (\frac{1}{h_g^2} - 1)}$ , so that the variance in gene expression explained by

549 genotype in each tissue is  $h_g^2$ . We considered four scenarios, defined by combination of the  
 550 proportion of tissues genetically correlated with the causal tissue and whether the causal tissue  
 551 was observed in the analysis: all or half of the tissues were correlated with causal tissue; the  
 552 causal tissue was or was not observed. We varied  $h_g^2$  from 0.01 to 0.1, and the genetic correlation  
 553 coefficient  $\rho$  between the causal and other tissues from 0.3 and 1.

554  
 555 Given the SNP-expression weights in a tissue and assuming that the trait under study  $Y$  has unit  
 556 variance and the true mean of the trait is related to expression levels in the causal tissue via  $E[Y]$   
 557  $= r X_{causal}$ , the cis-SNP GWAS z-scores for tissue  $i$  are distributed as  $\mathbf{Z} \sim \text{MVN}(\Sigma_G \times \mathbf{b} \times \beta_i, \Sigma_G)$ ,  
 558 where  $\mathbf{b} = \sqrt{N_{gwas} \times r^2}$ . For each tissue, we randomly sampled the z-scores from this  
 559 multivariate normal and set  $\mathbf{b}$  to 0.00, 6.78, 11.18, 14.36, 17.07, 19.60, 22.13, 24.84, 28.02, 32.42  
 560 to achieve the theoretical power of 5%, 10%, ..., 90% at alpha level of 0.05. For example, when

561  $r^2$  equals 1% (i.e., variation in gene expression in the target tissue explains 1% of the variability  
562 in the trait), the GWAS sample size  $N_{gwas}$  ranges from 4,602 to 105,074. We repeated the whole  
563 procedure on 400 randomly selected genes. For each gene, we further replicated 5 times for a  
564 total of 2000 replicates. For each statistical test procedure (sCCA, PCA, s-MultiXcan, etc.), and  
565 for each replicate, there are three possible outcomes: A: the gene is not heritable [i.e., no sCCA  
566 feature is significantly heritable, or no PCA, or no single tissue, depending on the procedure]; B:  
567 the gene is heritable but not significantly associated with the trait (after accounting for multiple  
568 testing across heritable tissues/features); and C: the gene is heritable and significant. We  
569 calculate Type I error as  $B/(B+C)$  and power as  $C/2000$ .

570

571

## 572 **Data application**

573 We applied sCCA-TWS approach to GTEx and 10 real life-style, polygenic complex traits and  
574 diseases (Table 1): whether a morning person [22], smoking status [22], body mass index [22],  
575 height [22], hair color [22], schizophrenia [23, 24], type 2 diabetes [25], coronary artery disease  
576 [26], breast cancer [27] and Alzheimer's disease [12]. Before applying sCCA to the GTEx data  
577 (version?), we removed individuals with data available in less than 40% of the tissues. We also  
578 removed tissues where less than 30% of the donors have sample. This resulted in a 134 (n)  
579 individual by 22 ( $p_2$ ) tissue expression matrix for each gene (list of tissues provided in S4  
580 Table). We imputed the missing expression data using the predictive mean method in R package  
581 MICE [17]. We performed sCCA on the imputed gene expression and genotype data from GTEx,  
582 extracted the top 3 canonical vectors for gene expression for each gene, and built three sCCA-  
583 features for each of the gene. Then we adopted the standard TWAS pipeline with the sCCA

584 features, filtering out sCCA-features that failed to converge in GCTA or had a heritability test p-  
585 value greater than 0.01. We built linear genetic weights with the rest sCCA-features using Lasso,  
586 Elastic Net (eNet), and top eQTL models, and performed TWAS with the model of highest cross  
587 validation  $R^2$ .

588

## 589 **Acknowledgements**

590 This work was supported by grants from the U.S. National Institutes of Health:

591 U01 CA194393, R01 HG009120, R01 CA22723, R35 CA197449 and U01

592 HG009088.

593

594

595

## 596 References

597

- 598 1. Visscher PM, Wray NR, Zhang Q, Sklar P, McCarthy MI, Brown MA, et al. 10 Years of  
599 GWAS Discovery: Biology, Function, and Translation. *American journal of human genetics*.  
600 2017;101(1):5-22. doi: 10.1016/j.ajhg.2017.06.005. PubMed PMID: 28686856; PubMed Central  
601 PMCID: PMC5501872.
- 602 2. Zhang Y, Qi G, Park JH, Chatterjee N. Estimation of complex effect-size distributions  
603 using summary-level statistics from genome-wide association studies across 32 complex traits.  
604 *Nat Genet*. 2018;50(9):1318-26. doi: 10.1038/s41588-018-0193-x. PubMed PMID: 30104760.
- 605 3. Alexander G, Arthur K, Huwenbo S, Gaurav B, Wonil C, Brenda WJHP, et al.  
606 Integrative approaches for large-scale transcriptome-wide association studies. *Nature Genetics*.  
607 2016;48(3). doi: 10.1038/ng.3506.
- 608 4. Gamazon ER, Wheeler HE, Shah KP, Mozaffari SV, Aquino-Michaels K, Carroll RJ, et  
609 al. A gene-based association method for mapping traits using reference transcriptome data. *Nat*  
610 *Genet*. 2015;47(9):1091-8. Epub 2015/08/11. doi: 10.1038/ng.3367. PubMed PMID: 26258848;  
611 PubMed Central PMCID: PMC552594.
- 612 5. Mancuso N, Kichaev G, Shi H, Freund M, Gusev A, Pasaniuc B. Probabilistic fine-  
613 mapping of transcriptome-wide association studies. *bioRxiv*. 2018.
- 614 6. Wu L, Cox A, Zheng W. Identification of novel susceptibility loci and genes for breast  
615 cancer risk: A transcriptome-wide association study of 229,000 women of European descent.  
616 2018.
- 617 7. Wainberg M, Sinnott-Armstrong N, Mancuso N, Barbeira AN, Knowles D, Golan D, et  
618 al. Transcriptome-wide association studies: opportunities and challenges. *bioRxiv*. 2018:206961.  
619 doi: 10.1101/206961.
- 620 8. Finucane HK, Reshef YA, Anttila V, Slowikowski K, Gusev A, Byrnes A, et al.  
621 Heritability enrichment of specifically expressed genes identifies disease-relevant tissues and cell  
622 types. *Nat Genet*. 2018;50(4):621-9. Epub 2018/04/11. doi: 10.1038/s41588-018-0081-4.  
623 PubMed PMID: 29632380; PubMed Central PMCID: PMC5896795.
- 624 9. Human genomics. The Genotype-Tissue Expression (GTEx) pilot analysis: multitissue  
625 gene regulation in humans. *Science*. 2015;348(6235):648-60. Epub 2015/05/09. doi:  
626 10.1126/science.1262110. PubMed PMID: 25954001; PubMed Central PMCID:  
627 PMC547484.
- 628 10. Erratum: Genetic effects on gene expression across human tissues. *Nature*.  
629 2018;553(7689):530. Epub 2017/12/21. doi: 10.1038/nature25160. PubMed PMID: 29258290.
- 630 11. Liu X, Finucane HK, Gusev A, Bhatia G, Gazal S, O'Connor L, et al. Functional  
631 Architectures of Local and Distal Regulation of Gene Expression in Multiple Human Tissues.  
632 *American journal of human genetics*. 2017;100(4):605-16. Epub 2017/03/28. doi:  
633 10.1016/j.ajhg.2017.03.002. PubMed PMID: 28343628; PubMed Central PMCID:  
634 PMC5384099.
- 635 12. Hu Y, Li M, Lu Q, Weng H, Wang J, Zekavat SM, et al. A statistical framework for  
636 cross-tissue transcriptome-wide association analysis. *bioRxiv*. 2018. doi: 10.1101/286013.
- 637 13. Barbeira AN, Pividori MD, Zheng J, Wheeler HE, Nicolae DL, Im HK. Integrating  
638 predicted transcriptome from multiple tissues improves association detection.(Research  
639 Article)(Report). *PLoS Genetics*. 2019;15(1). PubMed PMID: BarbeiraAlvaroN.2019Iptf.

- 640 14. Witten DM, Tibshirani R, Hastie T. A penalized matrix decomposition, with applications  
641 to sparse principal components and canonical correlation analysis. *Biostatistics* (Oxford,  
642 England). 2009;10(3):515-34. Epub 2009/04/21. doi: 10.1093/biostatistics/kxp008. PubMed  
643 PMID: 19377034; PubMed Central PMCID: PMCPMC2697346.
- 644 15. Liu Y, Chen S, Li Z, Morrison AC, Boerwinkle E, Lin X. ACAT: A Fast and Powerful p  
645 Value Combination Method for Rare-Variant Analysis in Sequencing Studies. *American journal*  
646 *of human genetics*. 2019;104(3):410-21. doi: 10.1016/j.ajhg.2019.01.002. PubMed PMID:  
647 30849328; PubMed Central PMCID: PMCPMC6407498.
- 648 16. Sun R, Hui S, Bader G, Lin X, Kraft P. Powerful gene set analysis in GWAS with the  
649 Generalized Berk-Jones statistic. *bioRxiv*. 2018. doi: 10.1101/361436.
- 650 17. van Buuren S, Groothuis-Oudshoorn CGM. mice: Multivariate Imputation by Chained  
651 Equations in R. *Journal of statistical software*. 2011;45(3):urn issn 1548--7660. PubMed PMID:  
652 vanBuurenStef2011mMib.
- 653 18. Gusev A. TWAS HUB 2017. Available from: <http://twas-hub.org/>.
- 654 19. Aschard H, Vilhjalmsón BJ, Greliche N, Morange PE, Tregouet DA, Kraft P.  
655 Maximizing the power of principal-component analysis of correlated phenotypes in genome-  
656 wide association studies. *American journal of human genetics*. 2014;94(5):662-76. Epub  
657 2014/04/22. doi: 10.1016/j.ajhg.2014.03.016. PubMed PMID: 24746957; PubMed Central  
658 PMCID: PMCPMC4067564.
- 659 20. Yang J, Lee SH, Goddard ME, Visscher PM. GCTA: a tool for genome-wide complex  
660 trait analysis. *American journal of human genetics*. 2011;88(1):76-82. doi:  
661 10.1016/j.ajhg.2010.11.011. PubMed PMID: 21167468; PubMed Central PMCID:  
662 PMCPMC3014363.
- 663 21. Friedman J, Hastie T, Tibshirani R. Regularization Paths for Generalized Linear Models  
664 via Coordinate Descent. *Journal of statistical software*. 2010;33(1):1-22. Epub 2010/09/03.  
665 PubMed PMID: 20808728; PubMed Central PMCID: PMCPMC2929880.
- 666 22. Loh P-R, Palamara PF, Price AL. Fast and accurate long-range phasing in a UK Biobank  
667 cohort. *Nature Genetics*. 2016;48(7):811--6. PubMed PMID: LohPo-Ru2016Faal.
- 668 23. Cowell R, Lucas E, Molina J, Meador-Woodruff J, Kleinman J, McCullumsmith R, et al.  
669 The Expression of Developmentally-regulated PGC-1alpha-Dependent Genes is Reduced in the  
670 Cortex of Patients with Schizophrenia. *Neuropsychopharmacology*. 2014;39:S587--S. PubMed  
671 PMID: CowellR2014TEoD.
- 672 24. Ruderfer DM, Ripke S, McQuillin A, Boocock J, Stahl EA, Pavlides JMW, et al.  
673 Genomic Dissection of Bipolar Disorder and Schizophrenia, Including 28 Subphenotypes. *Cell*.  
674 2018;173(7):1705--8674. PubMed PMID: RuderferDouglasM.2018GDoB.
- 675 25. Morris KV. The theory of RNA-mediated gene evolution. *Epigenetics*. 2015;10(1):1--5.  
676 PubMed PMID: MorrisKevinV2015TtoR.
- 677 26. Nelson CP, Goel A, Butterworth AS, Kanoni S, Webb TR, Marouli E, et al. Association  
678 analyses based on false discovery rate implicate new loci for coronary artery disease. *Nature*  
679 *Genetics*. 49(9):1385--91. PubMed PMID: NelsonChristopherPAabo.
- 680 27. Michailidou K, Lindström S, Dennis J, Beesley J, Hui S, Kar S, et al. Association  
681 analysis identifies 65 new breast cancer risk loci. 2017;551(7678). PubMed PMID:  
682 MichailidouKyriaki2017Aai6.
- 683



685 **Supporting information**

686

687 **S1 Fig. Proportion of significant ( $p < 0.05$ ) heritability tests for different expression features**

688 **when cis genetic variation is associated with expression in *all* tissues.**  $\rho$  denotes the strength

689 of the genetic correlation between expression in the causal tissue and tissues where expression is

690 also associated with cis germline variation ( $\varnothing$ correlated tissues  $\varnothing$ ).  $\varnothing$ Non-correlated tissues  $\varnothing$  are

691 tissues where local germline variation is not associated with gene expression. Here expression in

692 all of the tissues is genetically correlated with the causal tissue, and the causal tissue is not

693 observed (performance in the causal tissue is included as a reference). PC1 is the first principal

694 component of cross-tissue gene expression; sCCA-feature1 is the linear combination of tissue

695 expression values from the first pair of sCCA canonical variables.  $h^2$  denotes the proportion of

696 expression variance in the causal tissue explained by cis genetic variation.

697

698 **S2 Fig. Proportion of significant ( $p < 0.05$ ) heritability tests for different expression features**

699 **when cis genetic variation is associated with expression in *some* tissues.**  $\rho$  denotes the

700 strength of the genetic correlation between expression in the causal tissue and tissues where

701 expression is also associated with cis germline variation ( $\varnothing$ correlated tissues  $\varnothing$ ).  $\varnothing$ Non-correlated

702 tissues  $\varnothing$  are tissues where local germline variation is not associated with gene expression. Here

703 expression in half of the tissues is genetically correlated with the causal tissue, and the causal

704 tissue *is* observed. PC1 is the first principal component of cross-tissue gene expression; sCCA-

705 feature1 is the linear combination of tissue expression values from the first pair of sCCA

706 canonical variables.  $h^2$  denotes the proportion of expression variance in the causal tissue

707 explained by cis genetic variation.

708

709 **S3 Fig. Proportion of significant ( $p < 0.05$ ) heritability tests for the top three principal**  
710 **components summarizing gene expression across features (*half of the tissues are correlated***  
711 **with the causal tissue and causal tissue *not* observed).  $\rho$  denotes the strength of the genetic**  
712 correlation between expression in the causal tissue and tissues where expression is also  
713 associated with cis germline variation. Half of the tissues are genetically correlated with the  
714 causal tissue, which is not observed.  $h^2$  denotes the proportion of expression variance in the  
715 causal tissue explained by cis genetic variation.

716

717 **S4 Fig. Type I error rate for cis-heritability tests.** Proportion of simulations where local  
718 genetic variation was nominally statistically significantly associated with gene expression, in the  
719 scenario where no association was present. sCCA-Feature\_1: testing only the leading sCCA  
720 expression feature at the  $\alpha = 0.05$  level; PCA-feature\_1: testing only the lead cross-tissue  
721 expression principal component at the  $\alpha = 0.05$  level; All\_PCA-features and All\_sCCA-features:  
722 proportion of simulations where at least one of the top three PCA (resp. sCCA) features was  
723 significant at the  $\alpha = 0.05$  level; All\_single\_tissue: proportion of simulations where at least one of  
724 the 22 single-tissue tests was significant at the  $\alpha = 0.05$  level.

725

726 **S5 Fig. Type I error rate for cross-tissue TWAS methods.** Proportion of significant results  
727 under null average over all scenarios (Gene expression not associated with phenotype).

728

729 **S6 Fig. Comparison of the absolute z-score for sCCA-TWAS and single tissue TWAS using**  
730 **weights calculated from GTEx data and GWAS summary statistics from 10 complex traits.**

731 The TWAS test statistics using sCCA feature 1 and all single tissue weights from Fusion are

732 plotted on the x-axis and y-axis respectively. The blue line is the fitted regression line and red  
733 line is  $y=x$ .

734

735 **S7 Fig. Cumulative power for identify heritable gene when include sCCA feature 1 to**  
736 **feature 3.** The Y axis indicate the cumulative power of detecting heritable genes when include  
737 only sCCA feature 1, sCCA feature 1 and 2, and sCCA feature 1 to 3, average over all scenarios.

738

739 **S1 Table. Summary of simulation power when gene expression in other tissues *not***  
740 **correlated with the causal tissue**

741

742

743 **S2 Table. Summary of simulation power when gene expression in *half* of the tissues**  
744 **correlated with the causal tissue**

745

746 **S3 Table. Summary of simulation power when gene expression in *all* of the tissues**  
747 **correlated with the causal tissue**

748

749 **S4 Table. Summary of GTEx expression data**

750

751

752 **Figures**

753

754

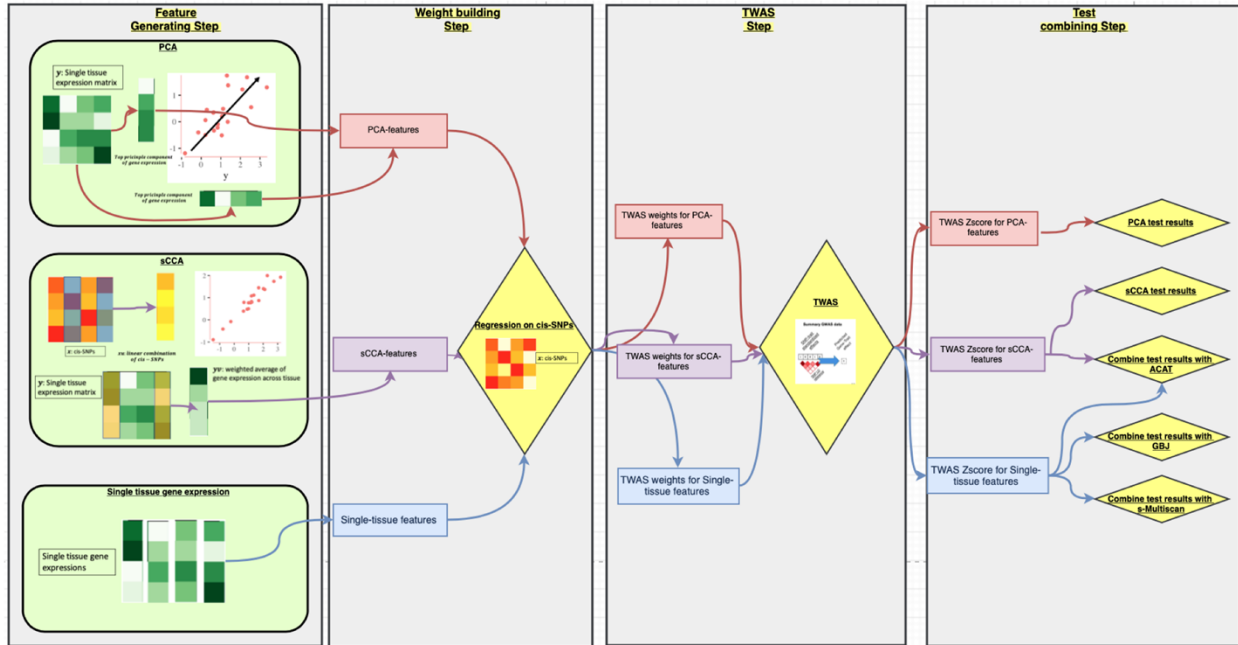

755

756 **Fig 1. Methods overview.** The single tissue based cross-tissue TWAS approach is shown in blue

757 arrows, the PCA based cross-tissue TWAS approach is shown in red arrows, and the sCCA-

758 TWAS approach is shown in purple arrows.

759

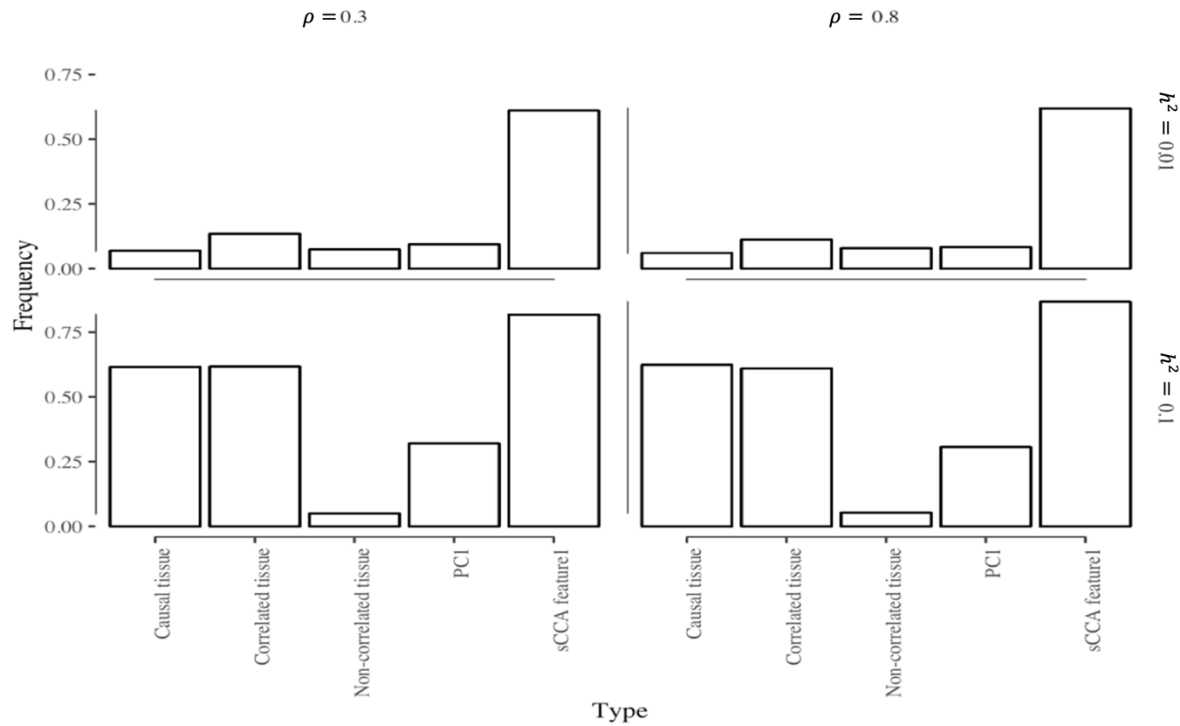

760

761 **Fig 2. Proportion of significant ( $p < 0.05$ ) heritability tests for different expression features**  
 762 **when cis genetic variation is associated with expression in some tissues.** Here  $\rho$  denotes the  
 763 strength of the genetic correlation between expression in the causal tissue and another tissue in  
 764 which the expression is also associated with cis-germline variation (‘‘correlated tissues’’). ‘‘Non-  
 765 correlated tissues’’ are the tissues where local germline variation is not associated with the gene  
 766 expression. Here expression in half of the tissues is genetically correlated with that in the causal  
 767 tissue, and the causal tissue is not observed (performance in the causal tissue is included as a  
 768 reference). PC1 is the first principal component of cross-tissue gene expression; sCCA-feature1  
 769 is the linear combination of tissue expression values from the first pair of sCCA canonical  
 770 variables.  $h^2$  denotes the proportion of expression variance in the causal tissue explained by cis-  
 771 genetic variation.

772

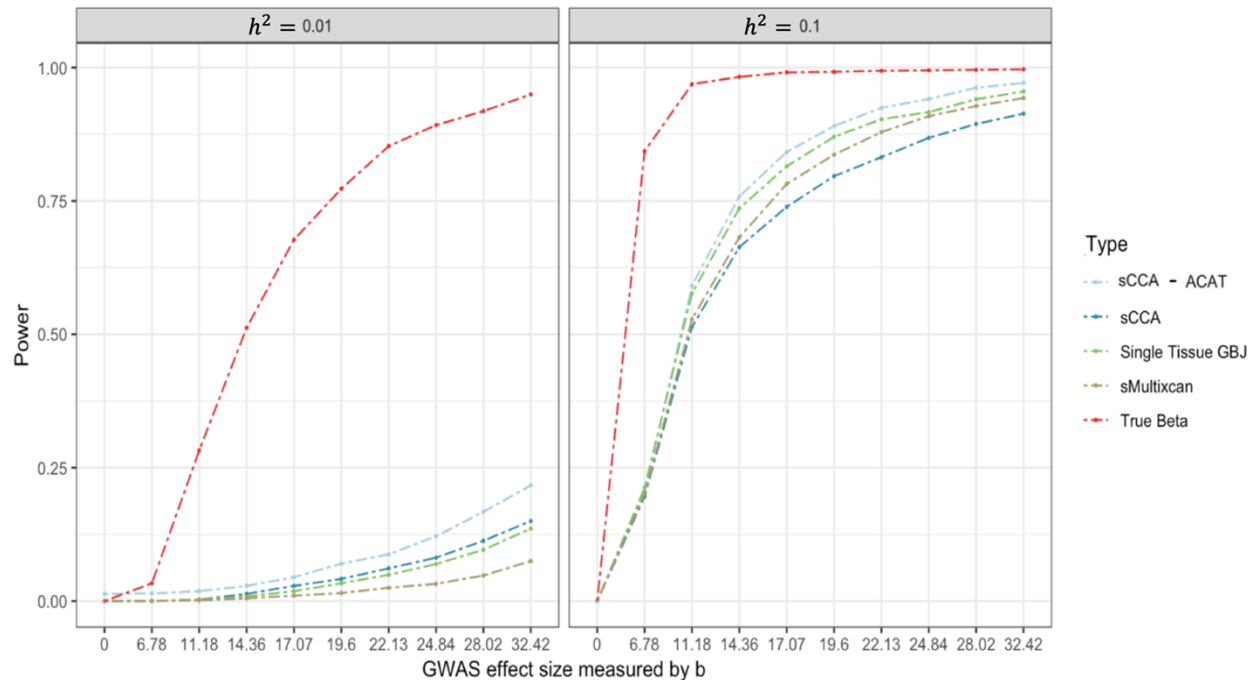

773

774 **Fig 3. Power comparison for cross-tissue TWAS methods.** Power (at  $\alpha=0.05$ ) as a function of

775 GWAS effect size. For each tissue, we randomly sampled the z-scores from this multivariate

776 normal and set  $b = \sqrt{N_{gwas} \times r^2}$  to 0.00, 6.78, 11.18, 14.36, 17.07, 19.60, 22.13, 24.84, 28.02,

777 32.42 to achieve theoretical power of 5%, 10%, ..., 90% at alpha level of 0.05. That is, when  $r^2$

778 =1% (when variation in gene expression in the target tissue explains 1% of the variability in the

779 trait), the GWAS sample size  $N_{gwas}$  ranges from 4,602 to 105,074.  $h^2$  denotes the proportion of

780 expression variance in the causal tissue explained by cis-genetic variation. sCCA-ACAT:

781 combining 3 sCCA-features and 22 single-tissue tests with ACAT; sCCA: combining top 3

782 sCCA-features tests using a Bonferroni correction; Single Tissue\_GBJ: combining 22 single-

783 tissue TWAS statistics using the GBJ test; s-MultiXcan: combining 22 single tissue based test

784 using s-MultiXcan); true weights: a TWAS test using the true (simulated) weights relating SNPs

785 to expression in the causal tissue.

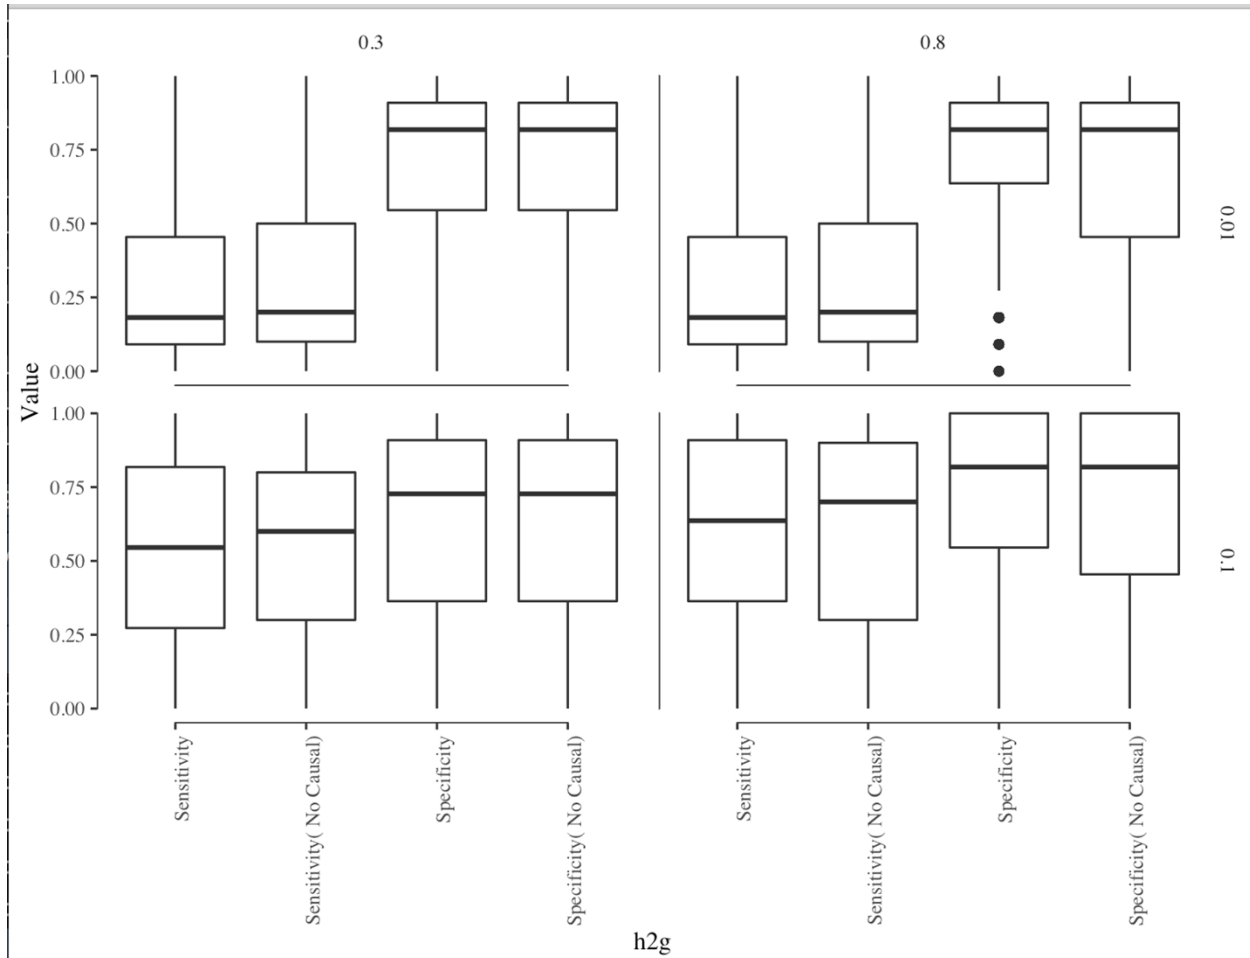

786

787 **Fig 4. Sensitivity and Specificity of sCCA features.**

788 The box plot of sensitivity and specificity of sCCA putting non-zero weights on the tissue where

789 genotype regulates gene expression. We varied underlying gene expression heritability ( $h^2$ ) and

790 correlation ( $\rho$ ) with the causal tissue as: (a)  $h^2 = 0.01, \rho = 0.3$ ; (b)  $h^2 = 0.01, \rho = 0.8$ ; (c)  $h^2$

791  $= 0.1, \rho = 0.3$ ; (d)  $h^2 = 0.1, \rho = 0.8$ .

792

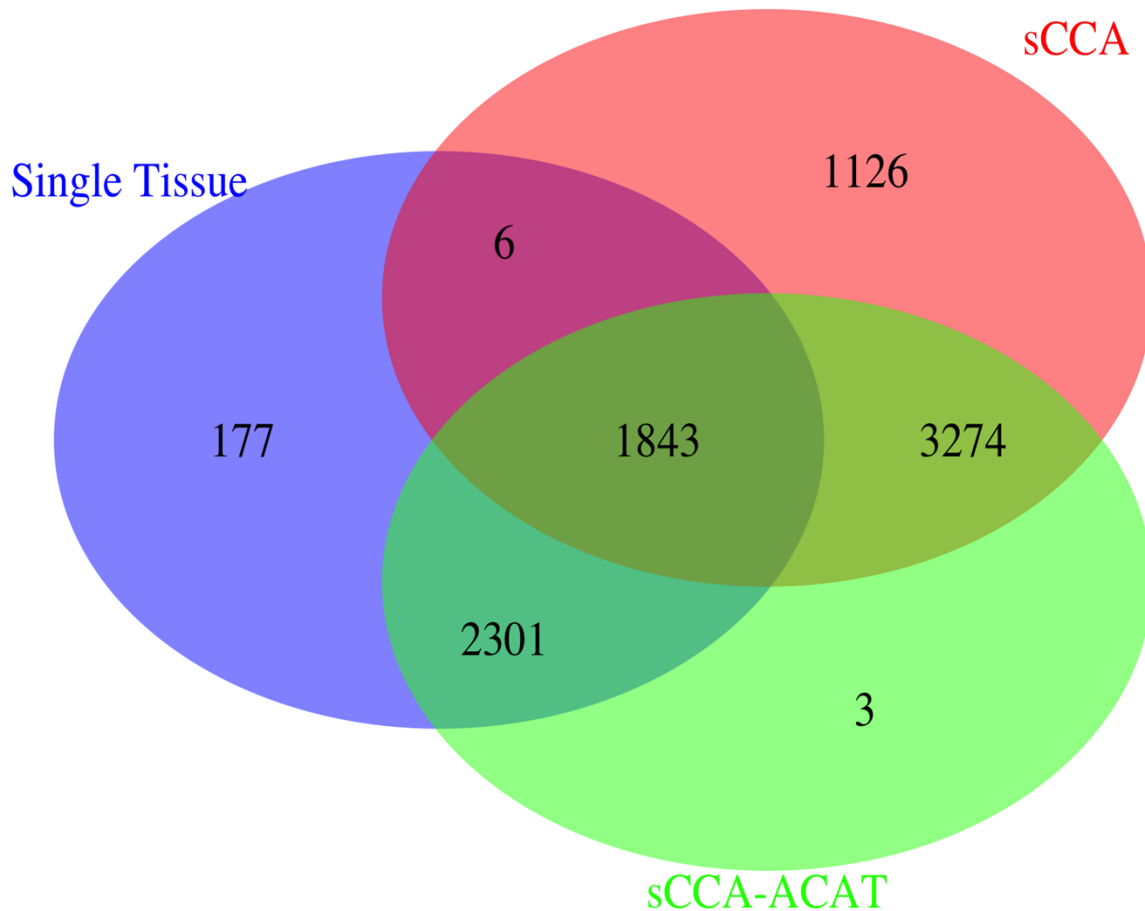

793  
794

795 **Fig 5. Venn Diagram of the significant expression-phenotype associations.** The Venn  
796 Diagram of the significant expression-phenotype associations for single tissue test results, sCCA-  
797 TWAS test results and ACAT combined results. sCCA-ACAT: combining 3 sCCA-features and  
798 22 single-tissue tests with ACAT; sCCA: combining top 3 sCCA-features tests using a  
799 Bonferroni correction; Single Tissue: combining 22 single-tissue TWAS statistics using  
800 Bonferroni.

801



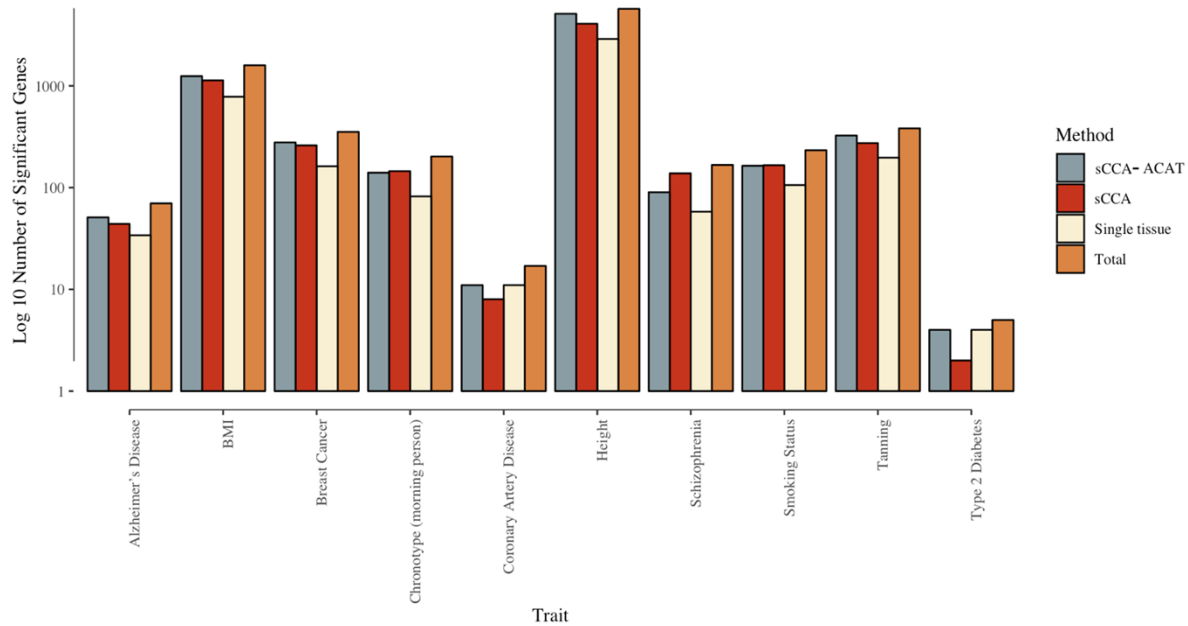

802

803 **Fig 6. Number of significant genes identified by ACAT combined test, sCCA-TWAS,**

804 **TWAS using single tissue GTEx data and the total number of significant genes identified**

805 **by all three methods.** Different phenotypes are arranged along the x-axis and the number of

806 significant genes identified by ACAT combined test, sCCA-TWAS, TWAS using single-tissue

807 GTEx data and the total number of significant genes identified by all three methods are shown in

808 the y-axis on log<sub>10</sub> scale. The information about the phenotype are provided in Table 1. sCCA-

809 ACAT: combining 3 sCCA-features and 22 single-tissue tests with ACAT; sCCA: combining top

810 3 sCCA-features tests using a Bonferroni correction; Single Tissue: combining 22 single-tissue

811 TWAS statistics using Bonferroni.

812

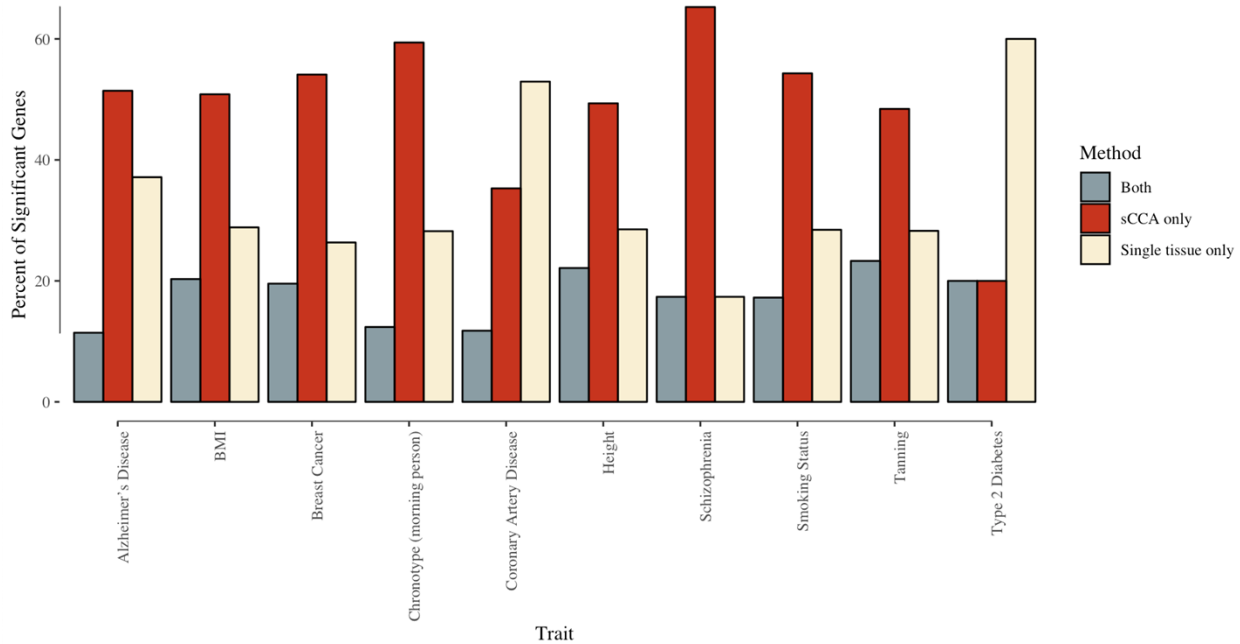

813

814 **Fig 7. Percentage of significant associations identified by both single tissue TWAS and**  
815 **sCCA TWAS, by only sCCA-TWAS, and by only identified by single tissue TWAS, among**  
816 **all associations identified with sCCA cross-tissue TWAS or single tissue TWAS.** Different  
817 phenotypes are arranged along the x-axis and the percentage of significant identified by both  
818 single tissue TWAS and sCCA-TWAS, by only sCCA-TWAS, and by only identified by single  
819 tissue TWAS are shown in the y-axis. The information about the phenotype are provided in  
820 Table 1.

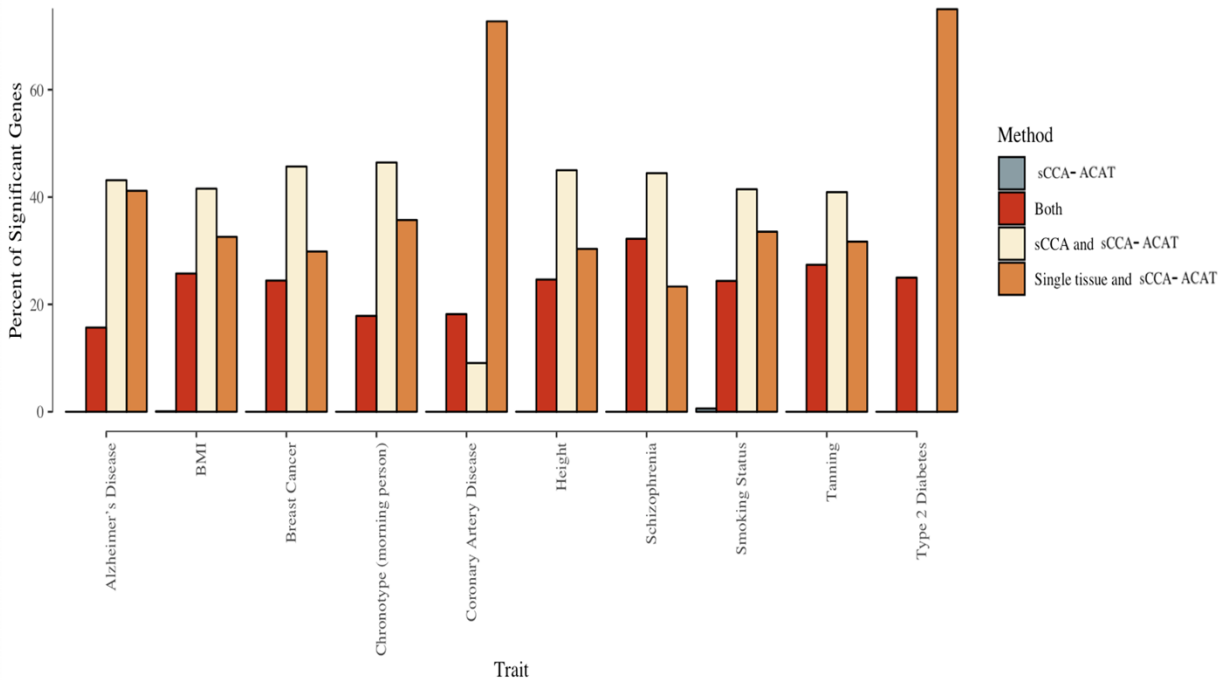

821

822

**Fig 8. Percent of significant identified by only sCCA-ACAT, by sCCA-ACAT, sCCA-**

823

**TWAS and single tissue TWAS, by both sCCA-TWAS and sCCA-ACAT, by both single**

824

**tissue TWAS and sCCA-ACAT among all significant genes. Different phenotypes are**

825

arranged along the x-axis and the percentage of significant associations by only ACAT, by

826

ACAT, sCCA-TWAS and single tissue TWAS, by both sCCA-TWAS and ACAT, by both single

827

tissue TWAS and ACAT are shown in the y-axis. The information about the phenotype are

828

provided in Table 1. sCCA-ACAT: combining 3 sCCA-features and 22 single-tissue tests with

829

ACAT; sCCA: combining top 3 sCCA-features tests using a Bonferroni correction; Single

830

Tissue: combining 22 single-tissue TWAS statistics using Bonferroni.

831

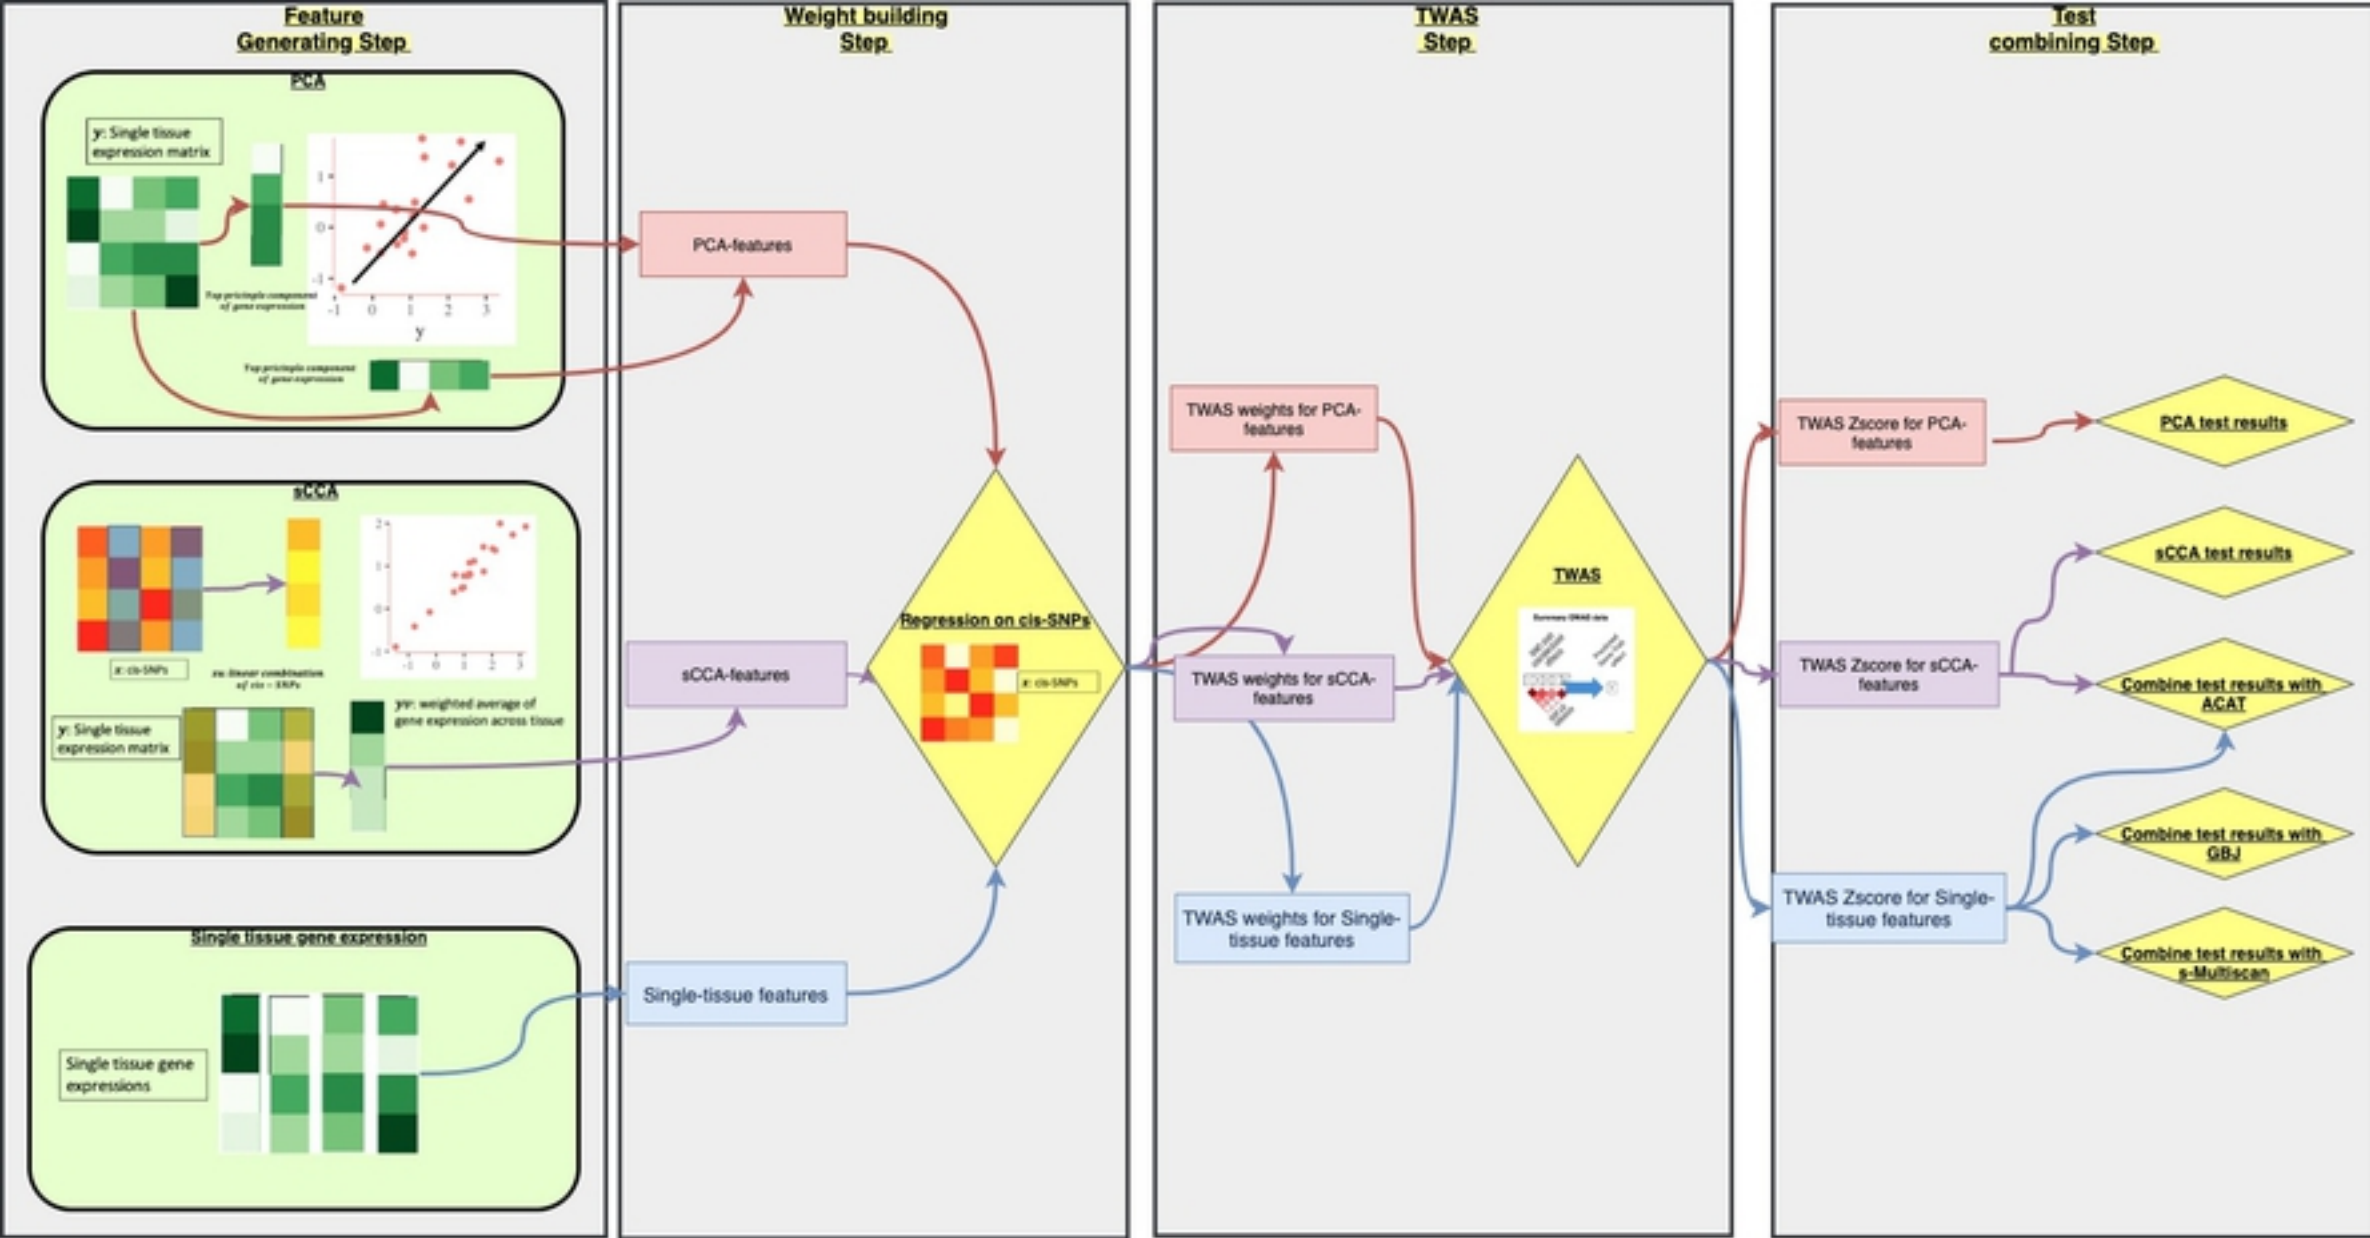

Figure 1
